# Supplementary material for: Keep it simple: designing a user-centred digital information system to support chronic disease management in low/middle-income countries
Source: PubMed Central journal article supplement (PMC9843217; doi:10.1136/bmjhci-2022-100641), 2023-01-13

**Supplemental Figure 1. Simple mobile application workflow at the point of care**

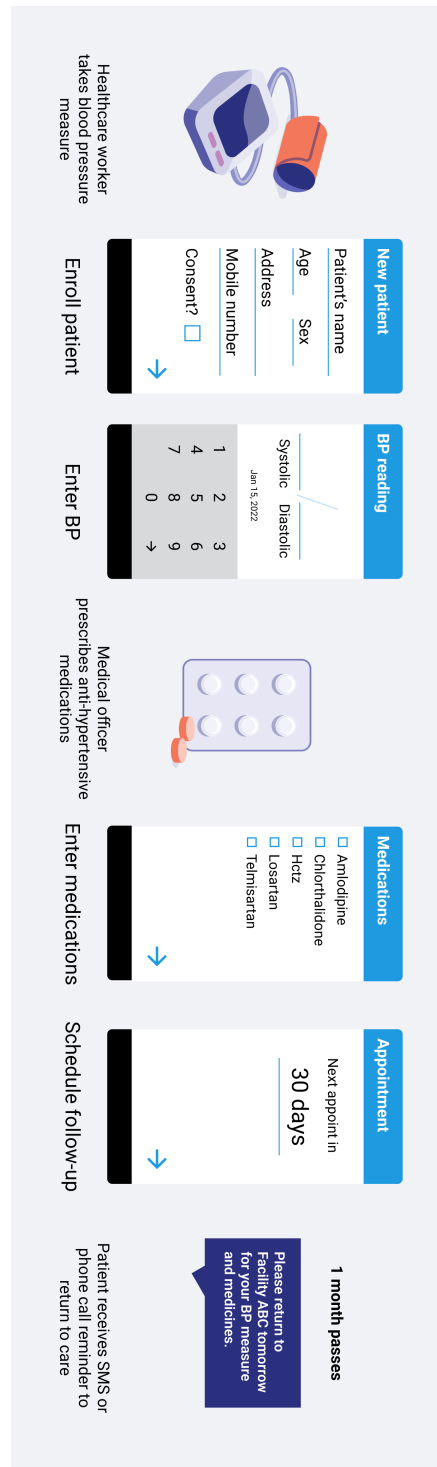

Supplement: bmjhci-2022-100641supp001.pdf [file bmjhci-2022-100641supp001.pdf]
