# Supplementary material for: Keep it simple: designing a user-centred digital information system to support chronic disease management in low/middle-income countries
Source: HighWire-hosted journal article supplement (doi:10.1136/bmjhci-2022-100641), 2023-01-01

**Supplemental Figure 3. Scale-up implementation timeline of the Simple mobile application**

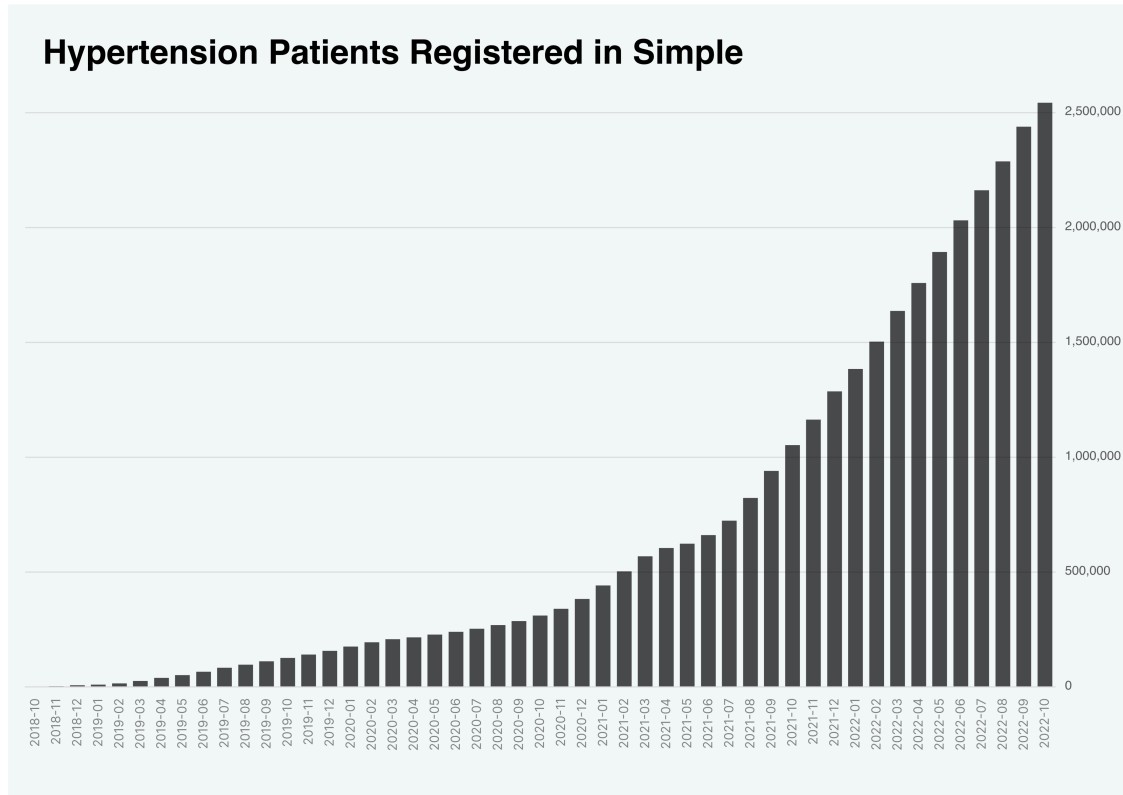

Supplement: bmjhci-2022-100641supp003_data_supplement.pdf [file bmjhci-2022-100641supp003_data_supplement.pdf]
