# Supplementary material for: Keep it simple: designing a user-centred digital information system to support chronic disease management in low/middle-income countries
Source: PubMed Central journal article supplement (PMC9843217; doi:10.1136/bmjhci-2022-100641), 2023-01-13
Supplement: bmjhci-2022-100641supp005.pdf [file bmjhci-2022-100641supp005.pdf]

**Supplemental Table 1. Minimal data elements used by the Simple mobile application**

| <b>Data Type</b>             | <b>Detail</b>                                                                                                                                                                                                                                                    |
|------------------------------|------------------------------------------------------------------------------------------------------------------------------------------------------------------------------------------------------------------------------------------------------------------|
| <b>Basic patient profile</b> | Name, sex, age, address, telephone number                                                                                                                                                                                                                        |
| <b>Unique ID</b>             | Where possible, use a local health ID; a UUID-based QR code identifier can be used in places without a usable ID system                                                                                                                                          |
| <b>Key comorbidities</b>     | Basic “yes/no” questions facilitate review of cardiovascular disease history (i.e., diabetes, heart attack, stroke, kidney disease)                                                                                                                              |
| <b>Blood pressures</b>       | Record all systolic and diastolic measurements in standardized format, with error checking for physiologically impossible values                                                                                                                                 |
| <b>Current medications</b>   | Many strong hypertension control programs choose simplified treatment protocols;* <sup>†</sup> a digital health system can track each patient’s current medications, facilitate clinical decision support, and review adherence to protocols                     |
| <b>Follow-up appointment</b> | Recording a patient’s next expected clinical appointment enables sending reminders and improving patient retention in care; recording how many patients were contacted is a good measure of health worker responsiveness and can be used for quality improvement |
| <b>Drug stock</b>            | Monthly data on stock received and end-of-month stock on hand in the facility pharmacy, if applicable; inconsistent drug supply and stockouts are major barriers to chronic disease treatment                                                                    |

\* Frieden TR, Varghese CV, Kishore SP, et al. Scaling up effective treatment of hypertension – A pathfinder for universal health coverage. *J Clin Hypertens (Greenwich)* 2019;21:1442-1449. doi: 10.1111/jch.13655.

† Jaffe MG, Frieden TR, Campbell NRC, et al. Recommended treatment protocols to improve management of hypertension globally: A statement by Resolve to Save Lives and the World Hypertension League (WHL). *J Clin Hypertens (Greenwich)* 2018;20:829-836. doi: 10.1111/jch.13280.
