# Supplementary material for: Keep it simple: designing a user-centred digital information system to support chronic disease management in low/middle-income countries
Source: BMJ Health Care Inform. 2023 Jan 13;30(1):e100641. doi: 10.1136/bmjhci-2022-100641 (PMC9843217; doi:10.1136/bmjhci-2022-100641)
Supplement: Supplementary data [file bmjhci-2022-100641supp006.pdf]

**Supplemental Table 2. Healthcare worker documentation time for recording new patient and follow-up patient visits in the Simple app**

|                                                                                | <b>New patient registration</b> | <b>Follow-up patient visit</b> |
|--------------------------------------------------------------------------------|---------------------------------|--------------------------------|
|                                                                                | <b>Median (IQR)</b>             | <b>Median (IQR)</b>            |
| <b>Scan ID card</b>                                                            | 6 seconds (0 seconds)           | 2 seconds (0 seconds)          |
| <b>Enter patient demographics, cardiovascular history, current medications</b> | 59 seconds (1 second)           | ---                            |
| <b>Enter blood pressure measurement</b>                                        | 5 seconds (0 seconds)           | 5 seconds (0 seconds)          |
| <b>Update Medications</b>                                                      | 5 seconds (1 second)            | 5 seconds (1 second)           |
| <b>Schedule follow-up visit</b>                                                | 1 seconds (0 seconds)           | 1 seconds (0 seconds)          |
| <b>Total</b>                                                                   | 76 seconds (2 seconds)          | 13 seconds (1 second)          |
